# Supplementary material for: ES-MION-Based Dual-Modality PET/MRI Probes for Acidic Tumor Microenvironment Imaging
Source: PubMed Central journal article supplement — ACS Omega. 2022 Jan 18;7(4):3442–51. doi: 10.1021/acsomega.1c05815 (PMC8811892; doi:10.1021/acsomega.1c05815), 2022-01-18
Supplement: ao1c05815_si_001.pdf [file ao1c05815_si_001.pdf]

# Electronic Supplementary Information

## ES-MIONS Based Dual-modality PET/MRI Probes for Acidic Tumor

### Microenvironment Imaging

*Xiuyan Wei<sup>1</sup> §, Haitao Zhao<sup>2</sup> §, Gang Huang<sup>3</sup>, Jianhua Liu<sup>1</sup> \*, Weina He<sup>1</sup> \*, Qingqing Huang<sup>3</sup> \**

1 Medical Chemistry and Bioinformatics Center, College of Basic Medical Sciences, Shanghai Jiao Tong University School of Medicine, Shanghai 200025, China.

2 Department of Nuclear Medicine, Institute of Clinical Nuclear Medicine, Renji Hospital, School of Medicine, Shanghai Jiao Tong University, Shanghai 200127, China.

3 Shanghai Key Laboratory of Molecular Imaging, Shanghai University of Medicine and Health Sciences, Shanghai 201318, China

§These authors contributed equally to this work.

\* E-mail: [jhliu7912@sjtu.edu.cn](mailto:jhliu7912@sjtu.edu.cn) (J. Liu); [hewn0319@sjtu.edu.cn](mailto:hewn0319@sjtu.edu.cn) (W. He); [qingqinghuang80@gmail.com](mailto:qingqinghuang80@gmail.com) (Q. Huang)

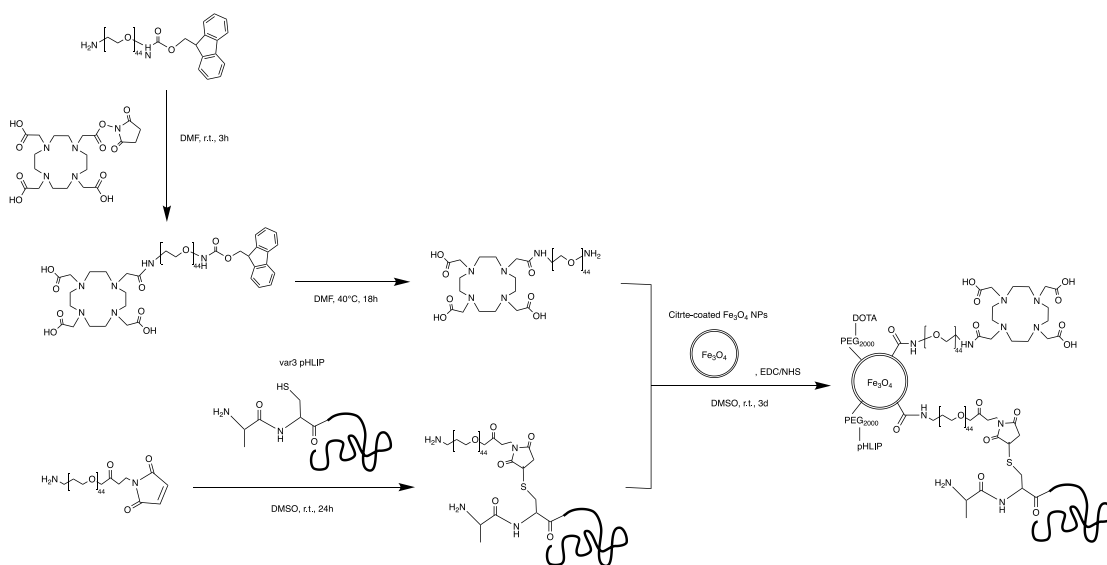

**Figure S1.** Synthesis route of  $\text{Fe}_3\text{O}_4$ -PEG-DOTA/pHLIP NPs.

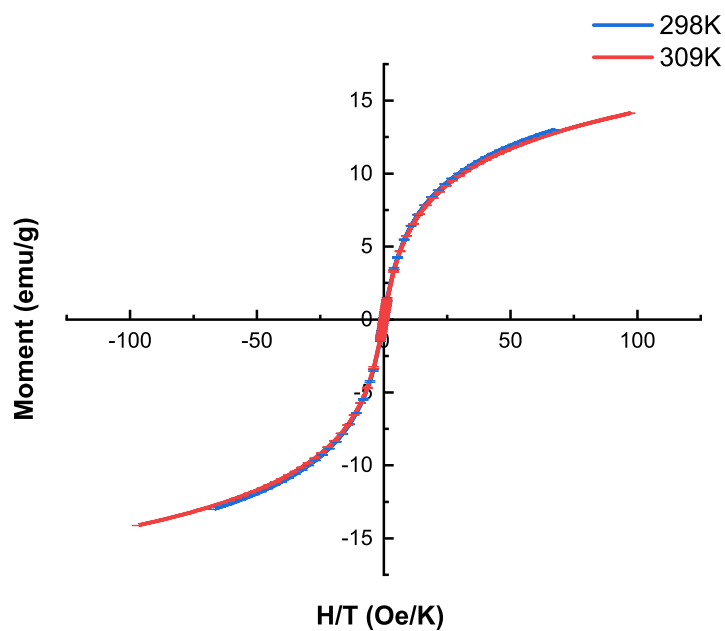

**Figure S2.** Magnetization curves of citrate-stabilized  $\text{Fe}_3\text{O}_4$  NPs measured at 298K and 309K.

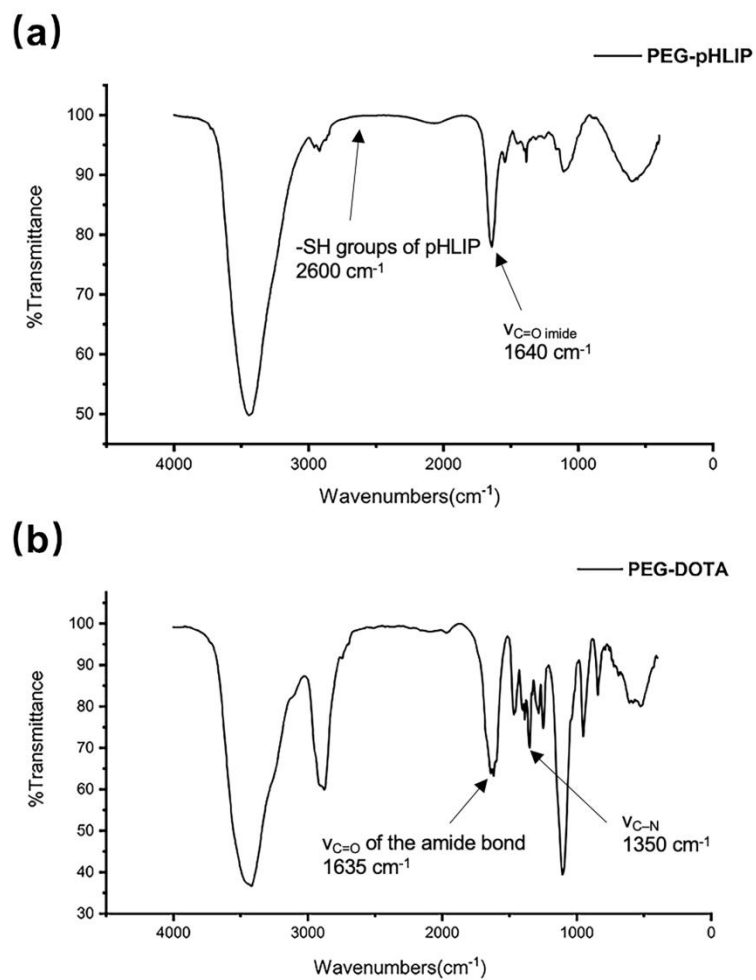

**Figure S3.** FTIR spectra of (a)  $\text{NH}_2$ -PEG-pHLIP and (b)  $\text{NH}_2$ -PEG-DOTA.

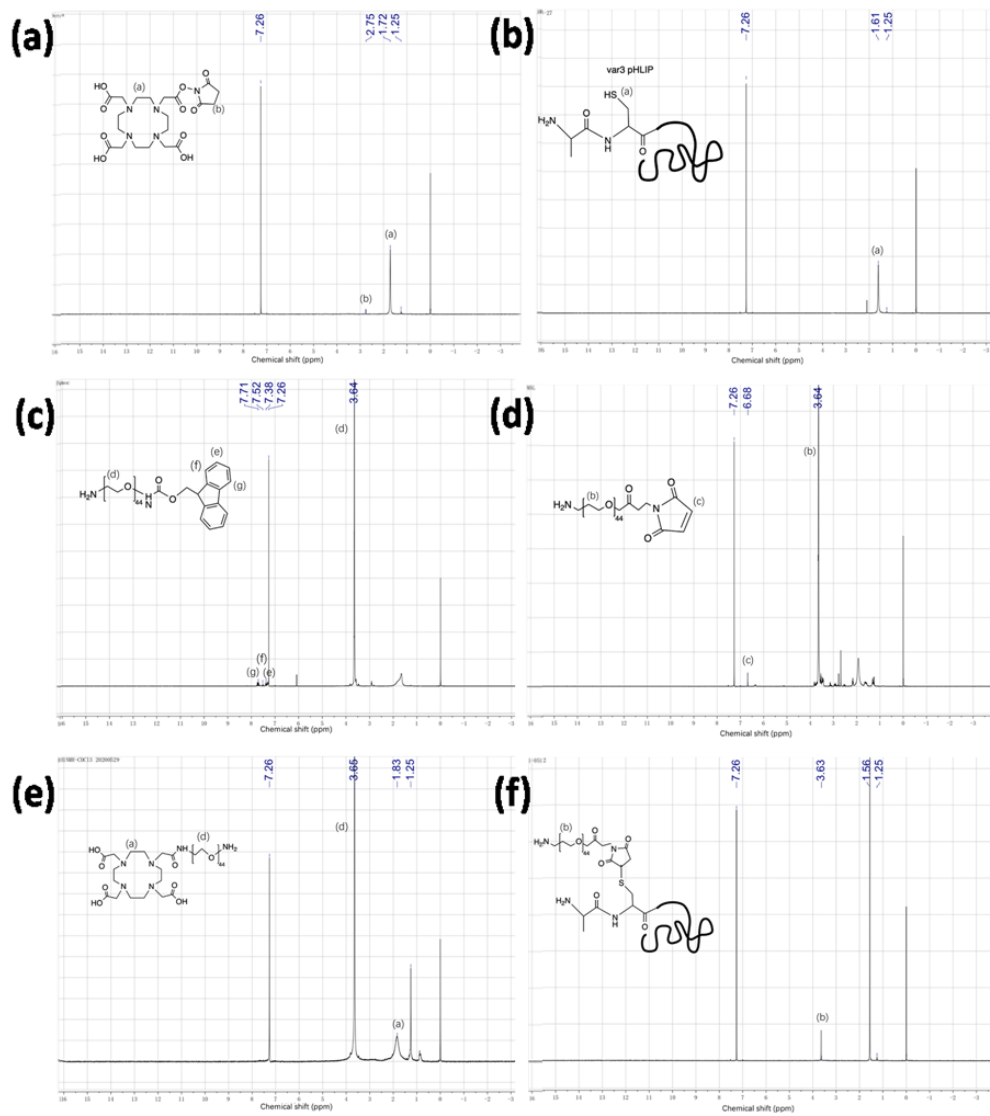

**Figure S4.**  $^1\text{H}$  NMR spectra of (a) DOTA-NHS, (b) Var3 pHLIP, (c)  $\text{NH}_2$ -PEG-Fmoc, (d)  $\text{NH}_2$ -PEG-Mal, (e)  $\text{NH}_2$ -PEG-DOTA and (f)  $\text{NH}_2$ -PEG-pHLIP.

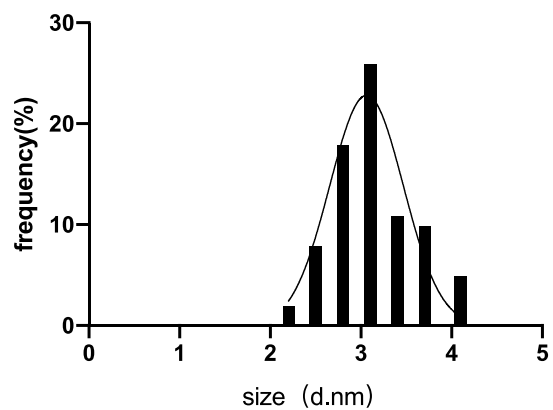

**Figure S5.** Size distribution of citrate-stabilized Fe<sub>3</sub>O<sub>4</sub> NPs with Gaussian fitting.

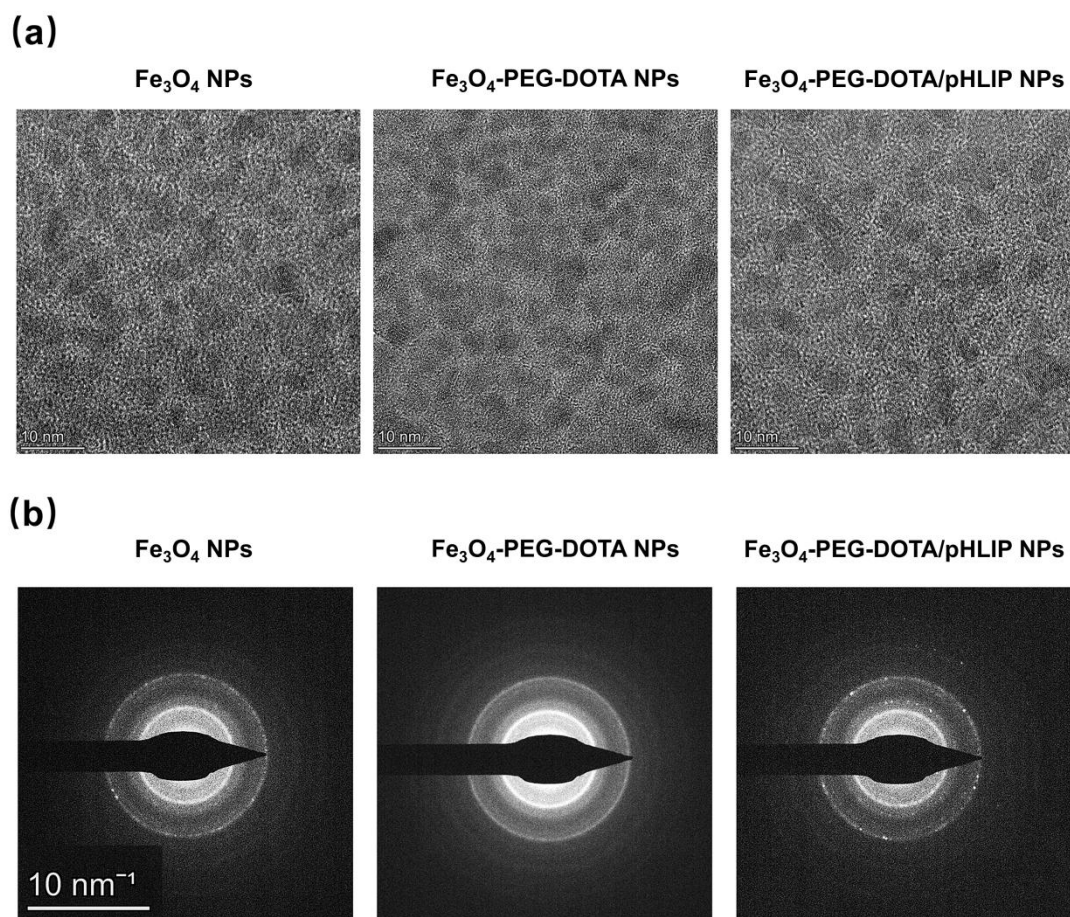

**Figure S6.** (a) TEM images and (b) SAED patterns of citrate-stabilized Fe<sub>3</sub>O<sub>4</sub> NPs, Fe<sub>3</sub>O<sub>4</sub>-PEG-DOTA NPs and Fe<sub>3</sub>O<sub>4</sub>-PEG-DOTA/pHLIP NPs.

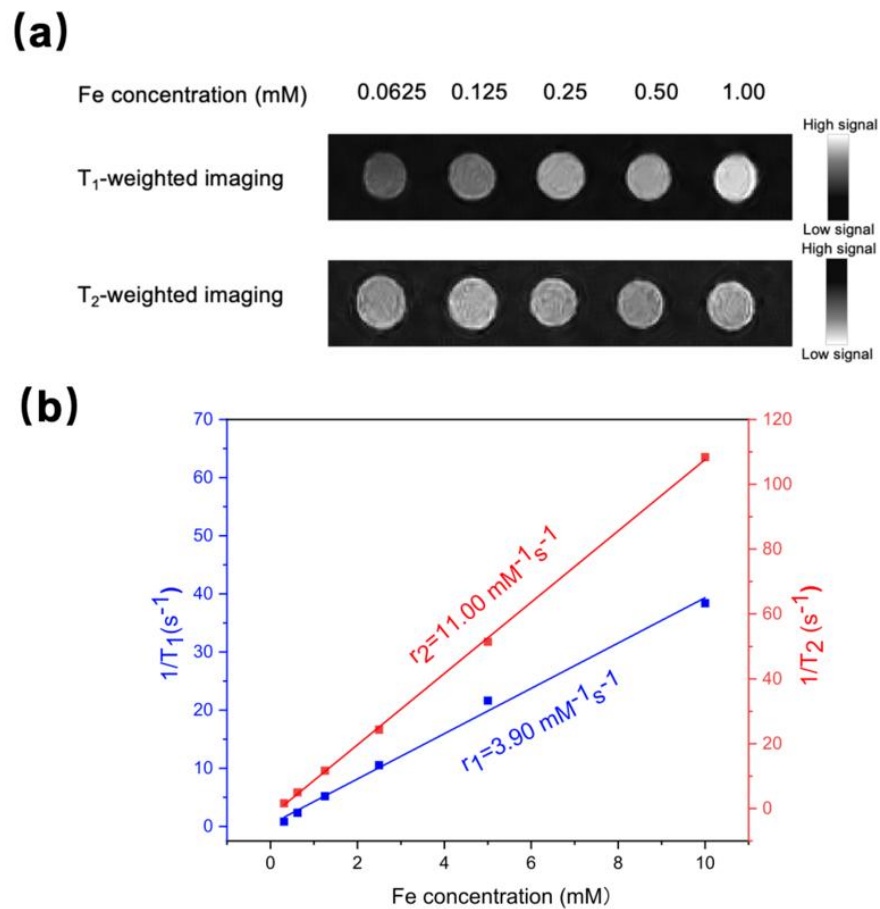

**Figure S7.** (a) Phantom images acquired from T<sub>1</sub>-weighted and T<sub>2</sub>-weighted MRI scans for Fe<sub>3</sub>O<sub>4</sub>-PEG-DOTA NPs at different Fe concentrations at the room temperature 32-34 °C and pH 6.8. (b) Plot of the relaxation rates of Fe<sub>3</sub>O<sub>4</sub>-PEG-DOTA NPs as a function of Fe concentration at the room temperature 32-34 °C and pH 6.8.

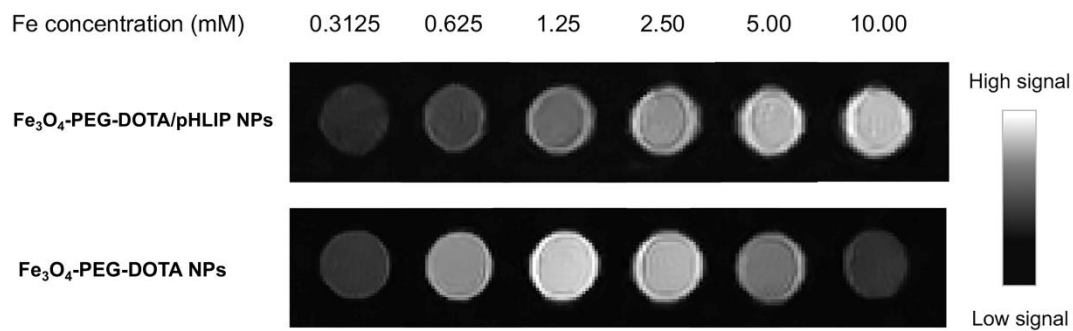

**Figure S8.** T<sub>1</sub>-weighted MR imaging of Fe<sub>3</sub>O<sub>4</sub>-PEG-DOTA and Fe<sub>3</sub>O<sub>4</sub>-PEG-DOTA/pHLIP NPs at the Fe concentrations of 0.3125, 0.625, 1.25, 2.50, 5.00, 10.00 mM, respectively.

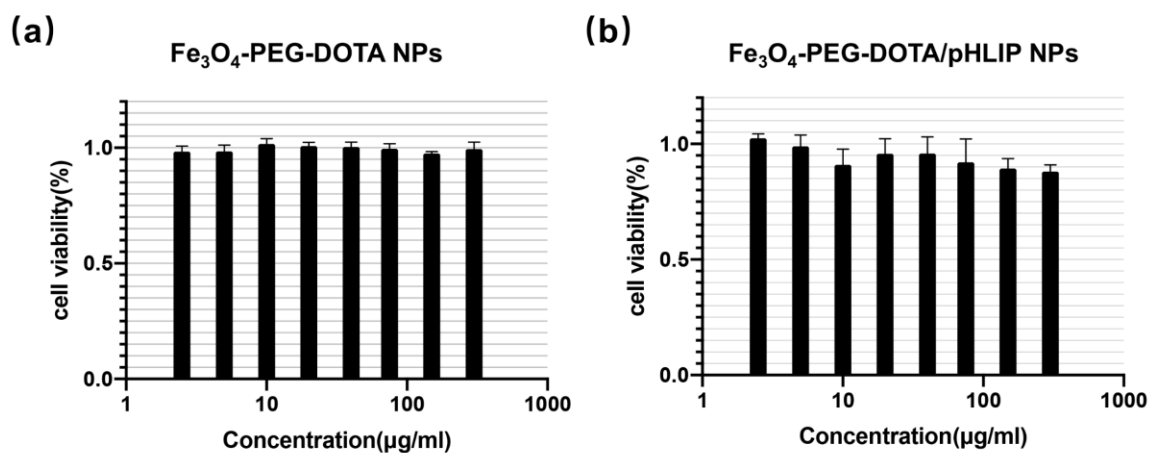

**Figure S9.** Cytotoxicity of 4T1 cells after treated with the (a) Fe<sub>3</sub>O<sub>4</sub>-PEG-DOTA NPs and (b) Fe<sub>3</sub>O<sub>4</sub>-PEG-DOTA/pHLIP NPs at different Fe concentrations for 24 h. 4T1 cells treated with PBS were used as control.

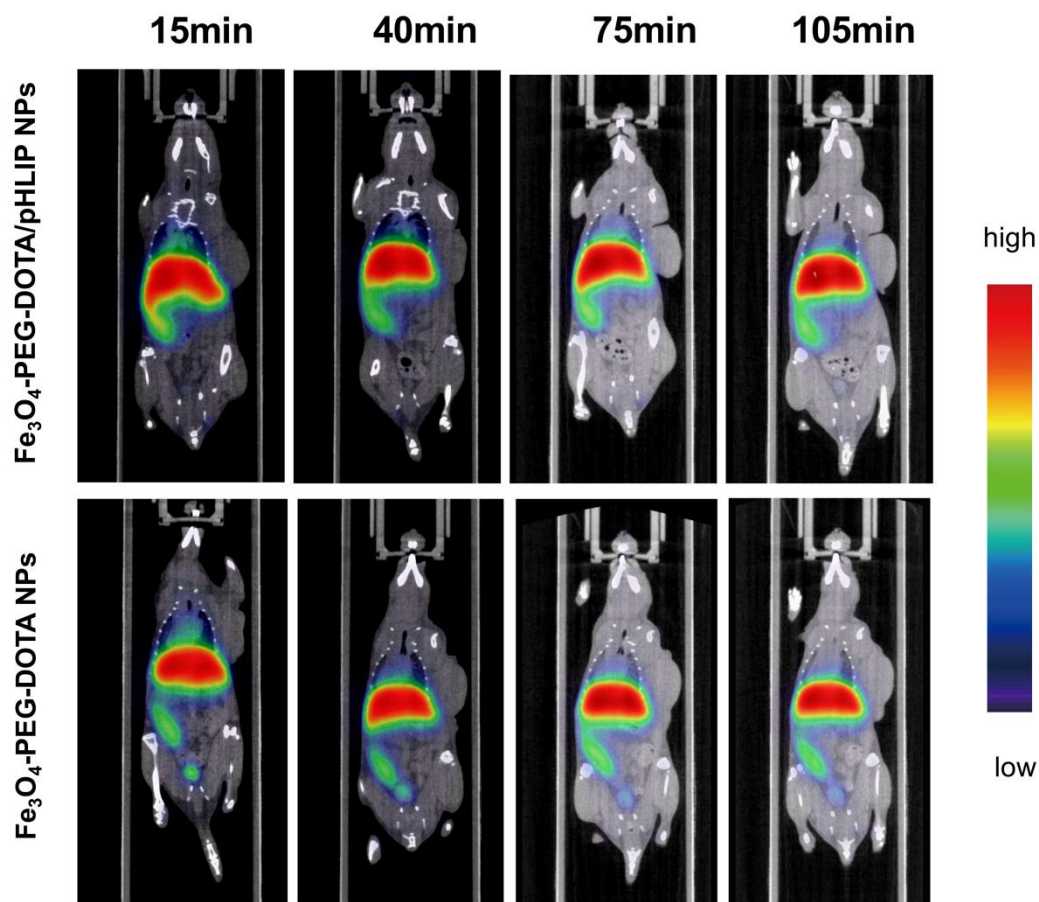

**Figure S10.** Whole-body PET/CT imaging on mice at 15 min, 40 min, 75 min, 105 min after the intravenous injection of  $\text{Fe}_3\text{O}_4\text{-PEG-}^{68}\text{Ga]DOTA/pHLIP NPs}$  or  $\text{Fe}_3\text{O}_4\text{-PEG-}^{68}\text{Ga]DOTA NPs}$ .

**Table S1.** Mean signal strength of in vitro tumor cellular uptake of  $\text{Fe}_3\text{O}_4\text{-PEG-}^{68}\text{Ga]DOTA/pHLIP NPs}$  and  $\text{Fe}_3\text{O}_4\text{-PEG-}^{68}\text{Ga]DOTA NPs}$  of 4T1 cells in pH 6.0, 6.4, 6.9, 7.4 respectively.

| pH  | $\text{Fe}_3\text{O}_4\text{-PEG-DOTA/pHLIP NPs}$ (cpm) | $\text{Fe}_3\text{O}_4\text{-PEG-DOTA NPs}$ (cpm) |
|-----|---------------------------------------------------------|---------------------------------------------------|
| 6.0 | 9130                                                    | 3172                                              |
| 6.4 | 6507                                                    | 3390                                              |
| 6.9 | 6603                                                    | 3133                                              |
| 7.4 | 4493                                                    | 3196                                              |
